# Supplementary material for: Multifunctional Janus particles composed of inorganic nanoparticles through emulsion confined assembly
Source: Royal Society of Chemistry journal article supplement (doi:10.1039/d4cp03699a), 2024-12-05
Supplement: d4cp03699a1.pdf [file d4cp03699a1.pdf]

**Supporting Information for the manuscript**

**Multifunctional Janus Particles Composed of Inorganic  
Nanoparticles through Emulsion Confined Assembly**

*Xuan Yue,<sup>1</sup> Feibo Li,<sup>1</sup> Xiying Fu,<sup>1</sup> Yanming Wang,<sup>\*1</sup> Nan Yan<sup>\*2</sup>*

<sup>1</sup>College of Materials Science and Engineering, Technology Innovation Center of Modified Plastics of Hebei Province, Hebei University of Engineering, Handan 056038, China

<sup>2</sup>College of Chemistry, Changchun Normal University, Changchun 130032, China

\*Corresponding author

\*E-mail: [yanmingwang@hebeu.edu.cn](mailto:yanmingwang@hebeu.edu.cn); [yannan@ccsfu.edu.cn](mailto:yannan@ccsfu.edu.cn)

**SUPPORTING FIGURES:**

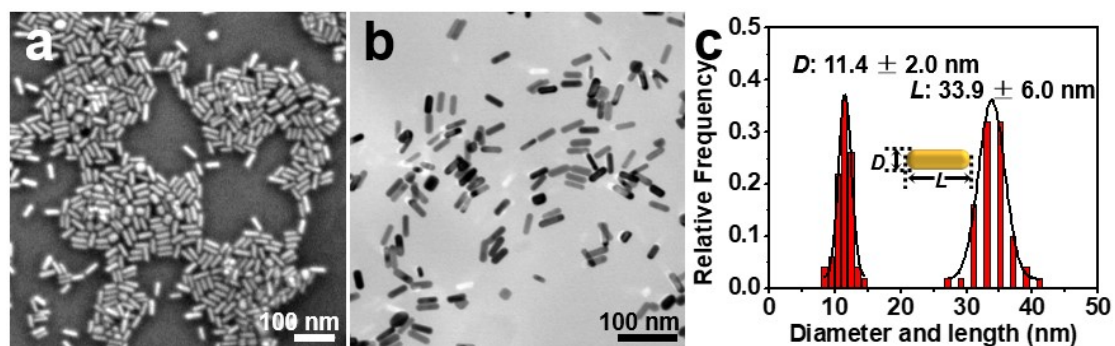

**Figure S1.** (a, b) SEM and TEM images of the synthesized AuNRs, respectively. (c) The diameter distribution histogram of AuNRs is obtained from the statistics of 100 AuNRs by TEM analysis software.

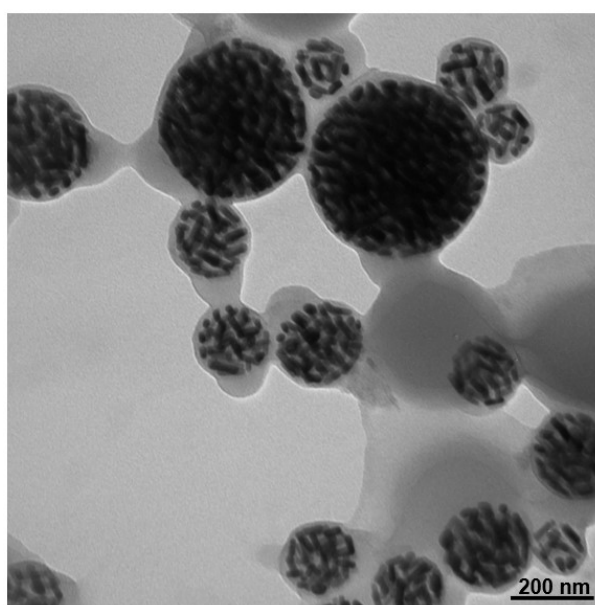

**Figure S2.** TEM image of the particles obtained by using PVA as the surfactant.

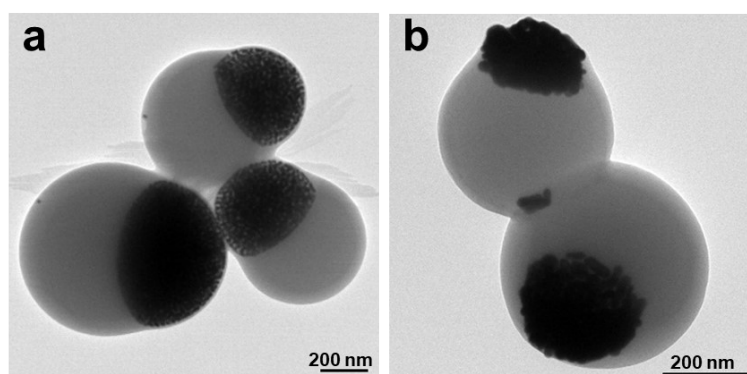

**Figure S3.** (a, b) TEM images of the Janus particles obtained from AuNRs( $L=33.9\text{nm}$ )@PS<sub>12k</sub>/P4VP and AuNRs( $L=57\text{nm}$ )@PS<sub>5k</sub>/P4VP at  $R = 5/5$ , respectively.

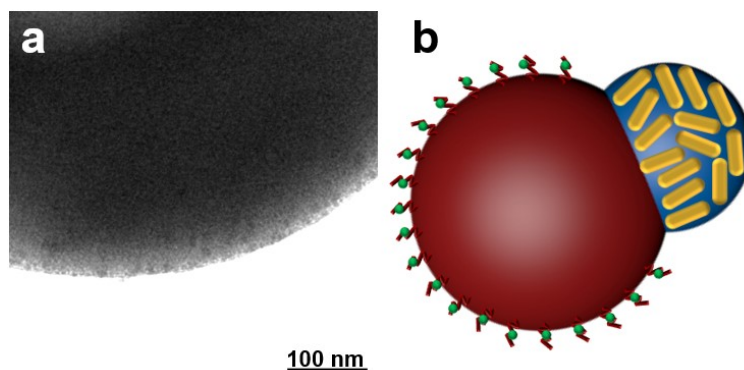

**Figure S4.** (a) The magnified TEM image of the bi-metal multifunctional Janus particles. (b) The schematic illustration of the bi-metal multifunctional Janus particles.

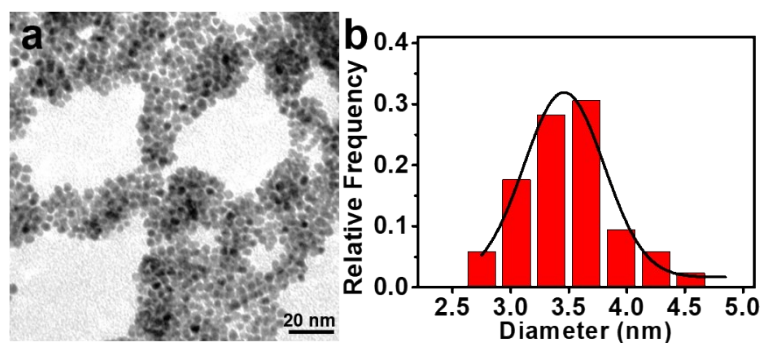

**Figure S5.** (a) TEM image of the synthesized PtNPs. (b) The diameter distribution histogram of PtNPs is obtained from the statistics of 100 PtNPs by TEM analysis software.
